# Supplementary material for: Cobalt and oxygen double doping induced C@MoS2–CoS2–O@C nanocomposites with an improved electronic structure and increased active sites as a high-performance anode for sodium-based dual-ion batteries
Source: Royal Society of Chemistry journal article supplement (doi:10.1039/d2ta00971d), 2022-01-01
Supplement: d2ta00971d1.pdf [file d2ta00971d1.pdf]

Oxygen-incorporated induced C@MoS<sub>2</sub>-CoS<sub>2</sub>-O@C nanocomposites with improved electronic structure as high-performance anode for sodium-based dual-ion batteries

Jingui Zong, Fei Wang\*, Chang Nie, Mingshu Zhao and Sen Yang

*School of Physics, MOE Key Laboratory for Non-Equilibrium Synthesis and Modulation of Condensed Matter, Key Laboratory of Shaanxi for Advanced Functional Materials and Mesoscopic Physics, Xi'an Jiaotong University, Xi'an 710049, ShaanXi, People's Republic of China.*

Corresponding author E-mail address: [feiwang@mail.xjtu.edu.cn](mailto:feiwang@mail.xjtu.edu.cn) (F. Wang).

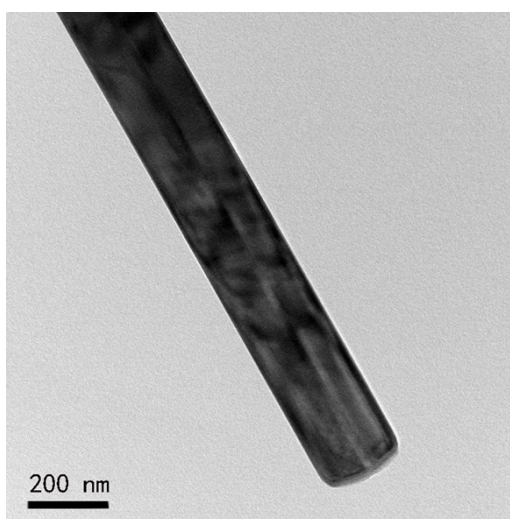

Fig. S1 TEM of MoO<sub>3</sub> nanorod.

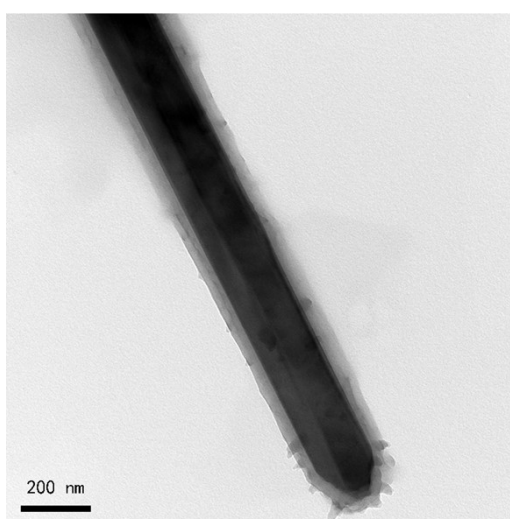

Fig. S2 TEM of MoO<sub>3</sub>@PPY nanorod.

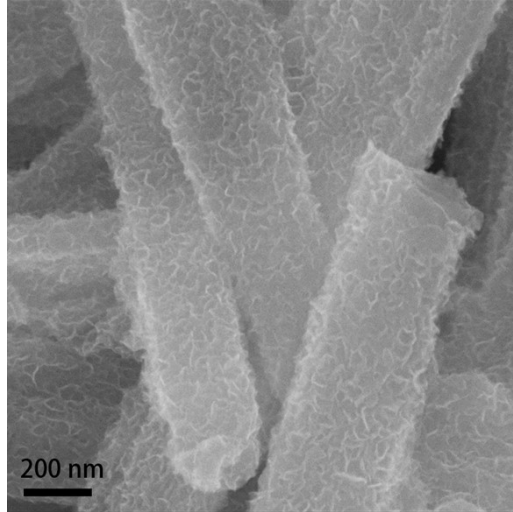

Fig. S3 SEM image of C@MoS<sub>2</sub>-CoS<sub>2</sub>.

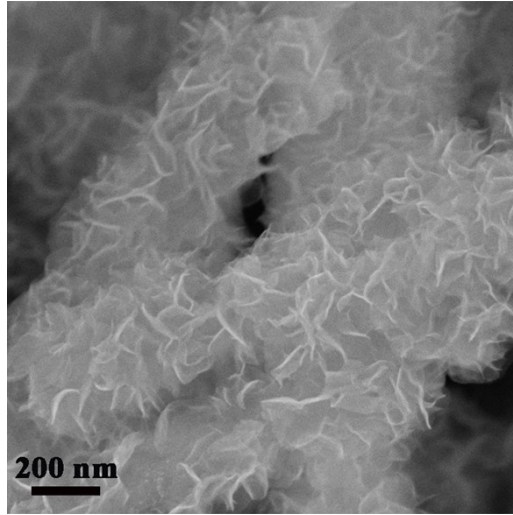

Fig. S4 SEM image of C@MoS<sub>2</sub>.

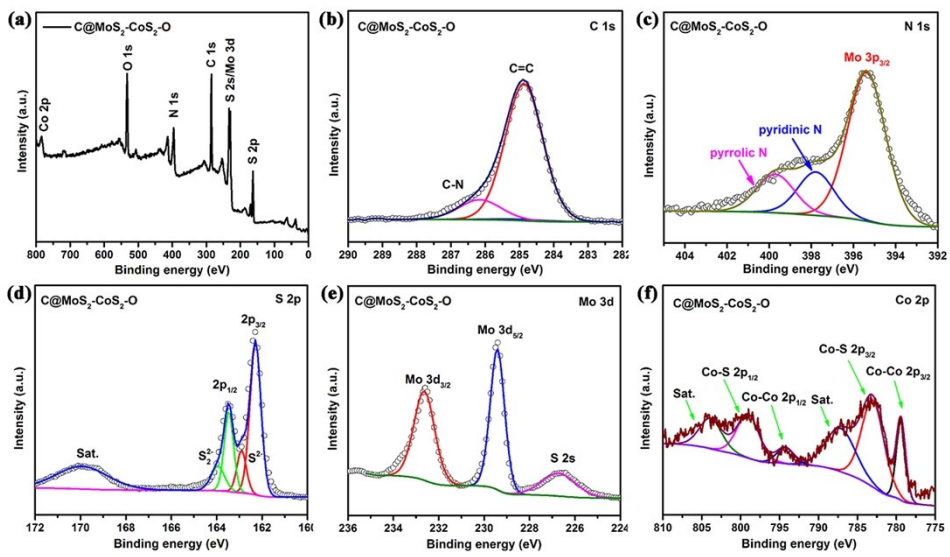

Fig. S5 XPS spectra of C@MoS<sub>2</sub>-CoS<sub>2</sub>-O. (a) survey spectrum. (b) C 1s spectrum. (c) N 1s

spectrum. (d) S 2p spectrum. (e) Mo 3d spectrum. (f) Co 2p spectrum.

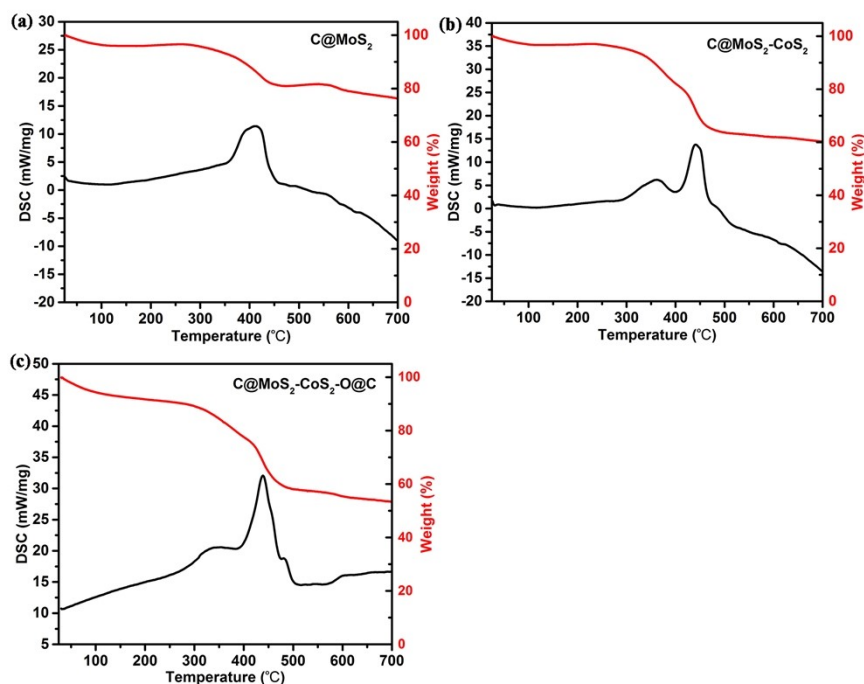

Fig. S6 DSC/TGA curves of (a) C@MoS<sub>2</sub>, (b) C@MoS<sub>2</sub>-CoS<sub>2</sub> and C@MoS<sub>2</sub>-CoS<sub>2</sub>-O@C nanocomposites.

The DSC/TGA measurements were conducted in air atmosphere to test the carbon contents of C@MoS<sub>2</sub>, C@MoS<sub>2</sub>-CoS<sub>2</sub> and C@MoS<sub>2</sub>-CoS<sub>2</sub>-O@C, as shown in Fig. S6. The clear weight-loss takes place from 300 to 700 °C, which is attributed to the process of MoS<sub>2</sub> oxidized to MoO<sub>3</sub>, CoS<sub>2</sub> oxidized to Co<sub>3</sub>O<sub>4</sub> and C oxidized to CO<sub>2</sub>. The mass loss of C@MoS<sub>2</sub>, C@MoS<sub>2</sub>-CoS<sub>2</sub> and C@MoS<sub>2</sub>-CoS<sub>2</sub>-O@C is 23.7%, 39.7% and 46.6%.

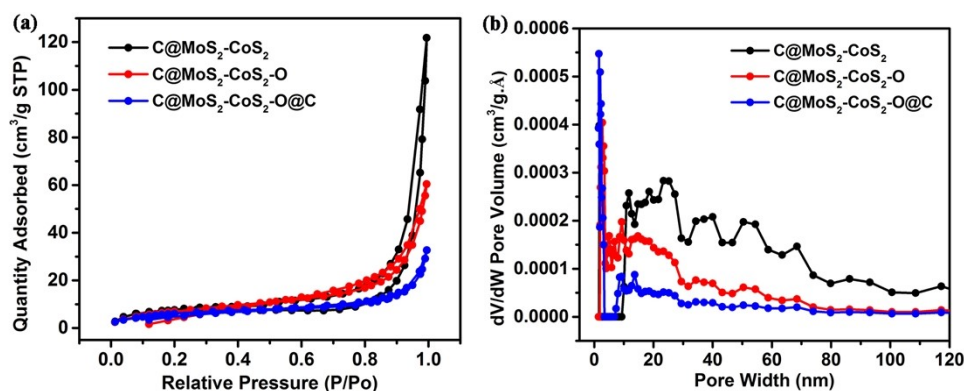

Fig. S7 (a) Nitrogen adsorption/desorption isotherms and (b) the pore distribution of C@MoS<sub>2</sub>-CoS<sub>2</sub>, C@MoS<sub>2</sub>-CoS<sub>2</sub>-O and C@MoS<sub>2</sub>-CoS<sub>2</sub>-O@C.

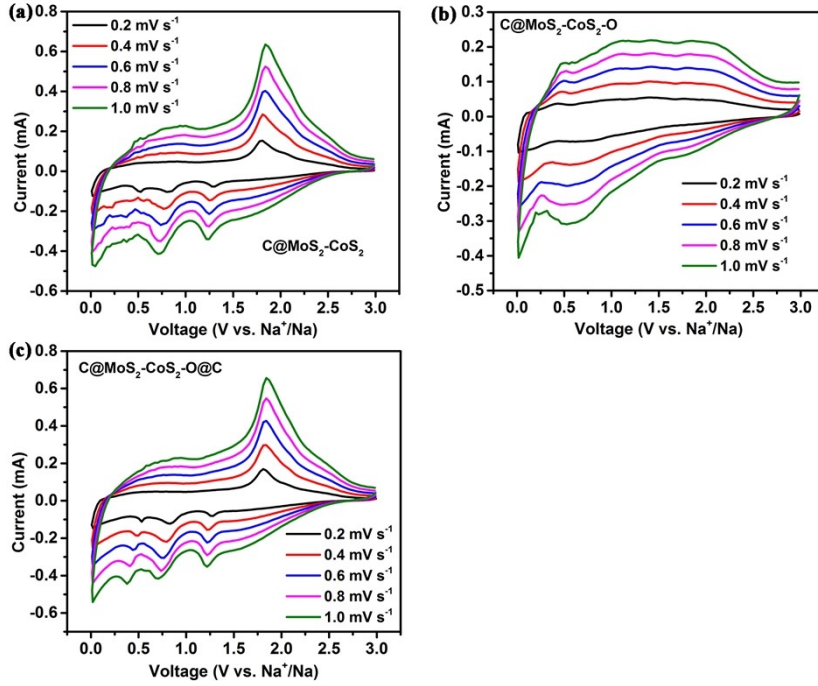

Fig. S8 (a) CV curves of the C@MoS<sub>2</sub>-CoS<sub>2</sub> as SIBs anode at different scanning rates. (b) CV curves of the C@MoS<sub>2</sub>-CoS<sub>2</sub>-O as SIBs anode at different scanning rates. (c) CV curves of the C@MoS<sub>2</sub>-CoS<sub>2</sub>-O@C as SIBs anode at different scanning rates.

The ratio of capacitive ( $k_1v$ ) and diffusion control contributions can be quantitatively divided by the formula:<sup>1</sup>

$$i(V) = k_1v + k_2v^{1/2}$$

where  $k_1$  and  $k_2$  are a constant at certain potentials and would be calculated by linear plotting  $i/v^{1/2}$  versus  $v^{1/2}$ .  $V$  is the specified voltage.  $i$  is the current at a given voltage. And  $v$  is the scanning rate.

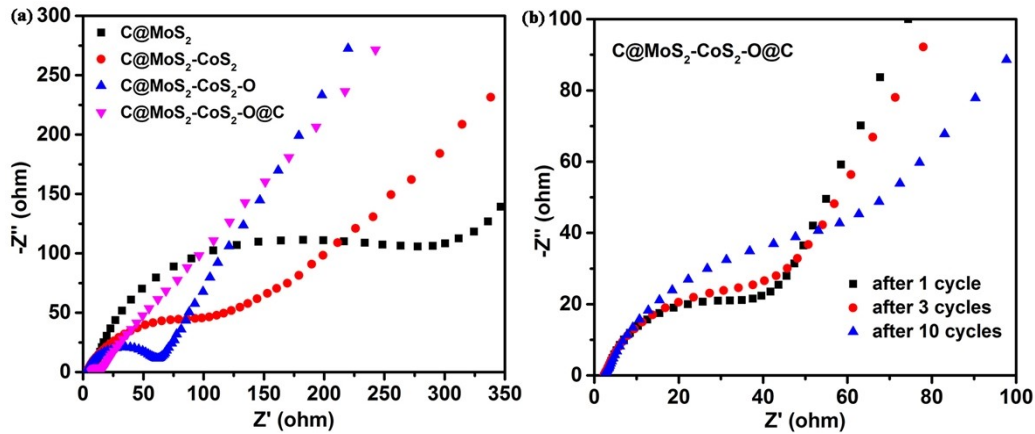

Fig. S9 (a) Electrochemical impedance spectra of C@MoS<sub>2</sub>, C@MoS<sub>2</sub>-CoS<sub>2</sub>, C@MoS<sub>2</sub>-CoS<sub>2</sub>-O and C@MoS<sub>2</sub>-CoS<sub>2</sub>-O@C for sodium storage. (b) Electrochemical impedance spectra of C@MoS<sub>2</sub>-CoS<sub>2</sub>-O@C after 1 cycle, 3 cycles and 10 cycles.

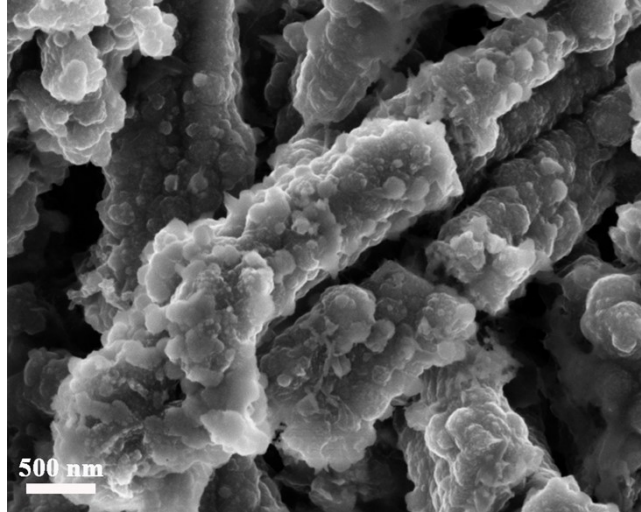

Fig. S10 SEM image of C@MoS<sub>2</sub>-CoS<sub>2</sub>-O@C after 150 cycles at 1A g<sup>-1</sup> for S-DIBs.

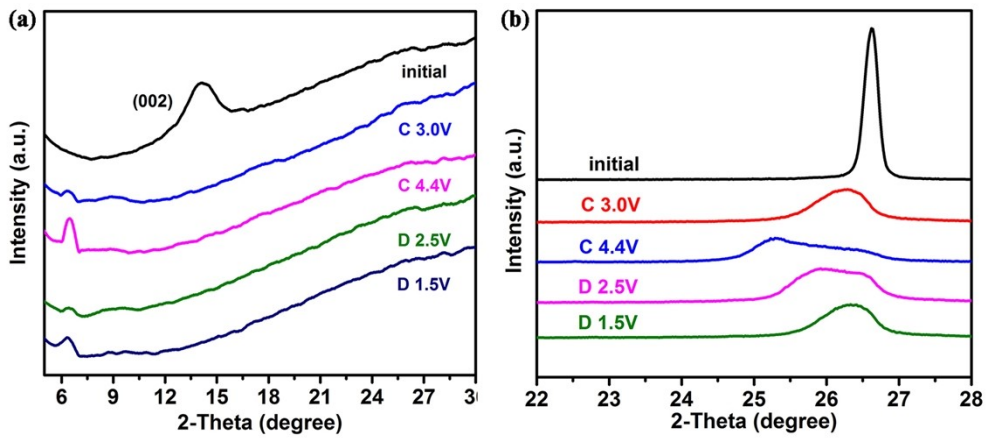

Fig. S11 Ex situ XRD patterns of (a) C@MoS<sub>2</sub>-CoS<sub>2</sub>-O@C anode and (b) the graphite cathode at different charge/discharge voltages.

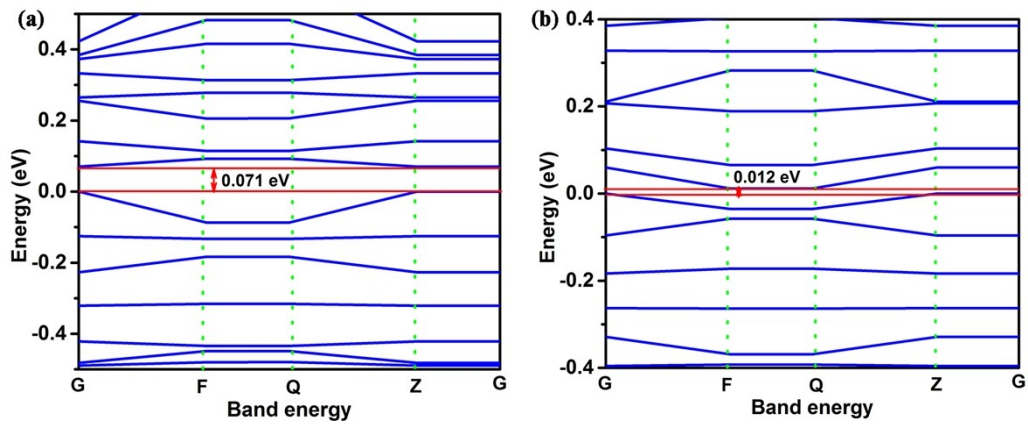

Fig. S12 (a) Calculated band structure of MoS<sub>2</sub>-CoS<sub>2</sub>. (b) Calculated band structure of MoS<sub>2</sub>-CoS<sub>2</sub>-O.

Table. S1 ICP-MS analysis of C@MoS<sub>2</sub>-CoS<sub>2</sub>.

| sample                               | Co   | Mo   |
|--------------------------------------|------|------|
|                                      | mg/g | mg/g |
| C@MoS <sub>2</sub> -CoS <sub>2</sub> | 165  | 681  |

Table. S2 Energy spectrum analysis of C, N, O, S, Mo and Co atomic percentages for C@MoS<sub>2</sub>-CoS<sub>2</sub>, C@MoS<sub>2</sub>-CoS<sub>2</sub>-O and C@MoS<sub>2</sub>-CoS<sub>2</sub>-O@C.

| samples                                   | C<br>At% | N<br>At% | O<br>At% | S<br>At% | Co<br>At% | Mo<br>At% |
|-------------------------------------------|----------|----------|----------|----------|-----------|-----------|
| C@MoS <sub>2</sub> -CoS <sub>2</sub>      | 35.82    | 4.52     | 31.43    | 18.21    | 1.50      | 8.53      |
| C@MoS <sub>2</sub> -CoS <sub>2</sub> -O   | 39.64    | 4.93     | 35.61    | 11.52    | 1.65      | 6.65      |
| C@MoS <sub>2</sub> -CoS <sub>2</sub> -O@C | 55.92    | 9.88     | 18.18    | 9.66     | 1.84      | 4.54      |

**Reference:**

1 K. Zhang, M. Park, L. Zhou, G.-H. Lee, J. Shin, Z. Hu, S.-L. Chou, J. Chen and Y.-M. Kang, *Angew. Chem*, 2016, **128**, 13014.
